# Supplementary material
Source: Springer Nature journal article supplement (https://www.springermedizin.de/resource/supplementary/13075_2006_1807_MOESM9_ESM.pdf/9690632)

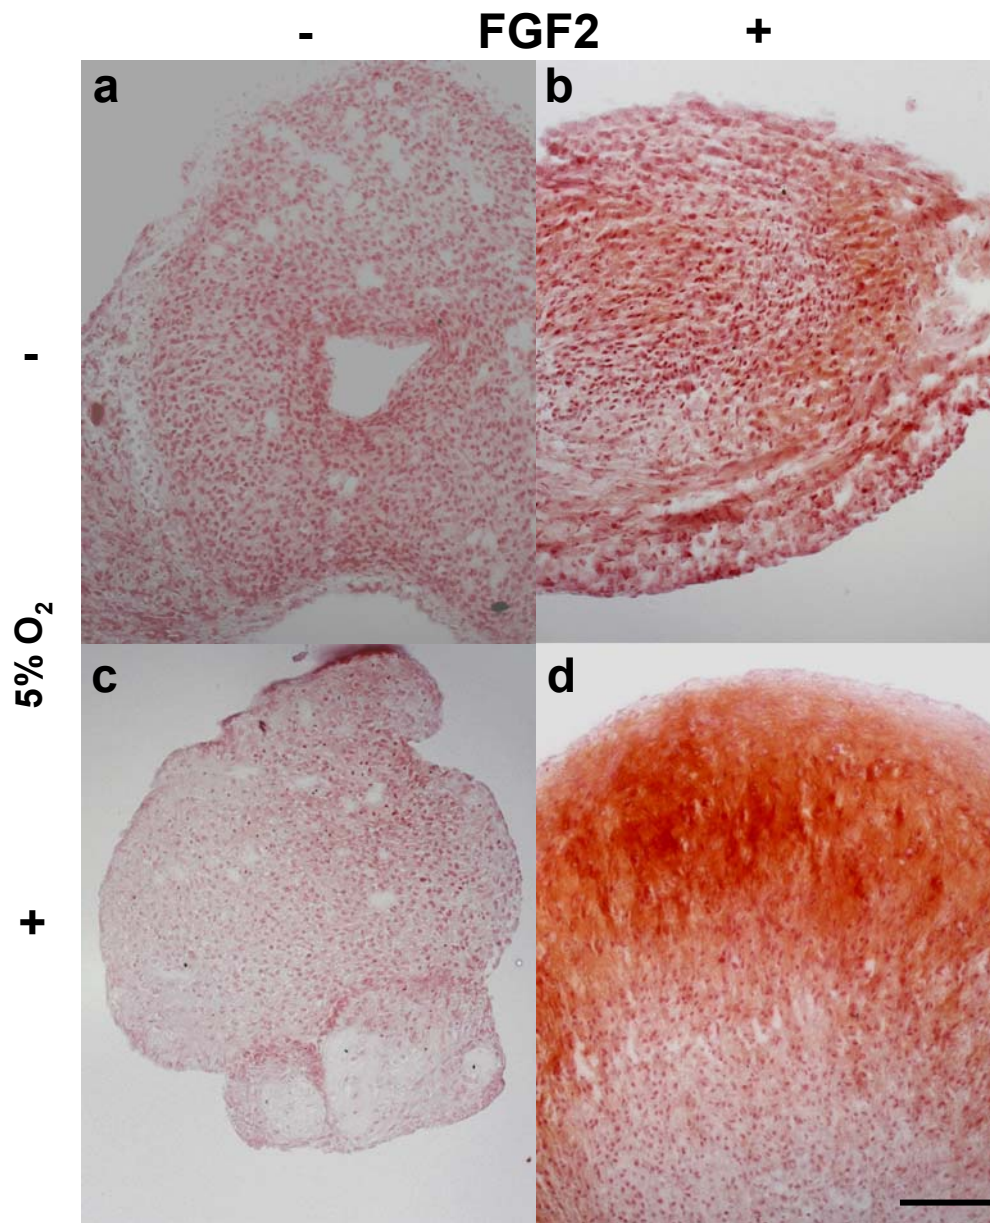

Figure 6

Adesida et al.

Supplement: MOESM9 [file 9690632]
